# Supplementary material for: The Phenotypic Spectrum of PRRT2-Associated Paroxysmal Neurologic Disorders in Childhood
Source: PubMed Central journal article supplement (PMC7719266; doi:10.3390/biomedicines8110456), 2020-10-28
Supplement: biomedicines-08-00456-s001.pdf [file biomedicines-08-00456-s001.pdf]

| Variant              | Protein            | Prediction (CADD, SIFT, PolyPhen2)                | Reference                                                                | Inheritance |
|----------------------|--------------------|---------------------------------------------------|--------------------------------------------------------------------------|-------------|
| c.323_324del         | p.(Thr108Serfs*25) | NA                                                | Yang (2014) Zhonghua Er Ke Za Zhi 52, 806; Zeng (2018) J Hum Genet 63: 9 | de novo     |
| c.341_342del         | p.(Val114Glufs*19) | NA                                                | this study                                                               | familial    |
| c.593_594del         | p.(Pro198Argfs*26) | NA                                                | this study                                                               | familial    |
| c.649dupC            | p.(Arg217Profs*8)  | NA                                                | Chen (2011) Nat Genet 43, 1252; Heron (2012) Am J Hum Genet 90: 152      | familial    |
| c.836C>T             | p.(Pro279Leu)      | 25.3, deleterious (0), probably damaging (0.999)  | Møller (2016) Mol Syndromol 7, 210; Zhao (2019) CNS Neurosci Ther        | familial    |
| c.843G>T             | p.(Trp281Cys)      | 33, deleterious (0,01), probably damaging (0.997) | this study                                                               | familial    |
| c.(?-65)_(1243-?)del | exon 2-4 del       | NA                                                | this study                                                               | de novo     |
| 16p11.2del           | 16p11.2 del        | NA                                                | Vlaskamp (2019) Eur J Med Genet 62, 265                                  | de novo     |

All variants are absent in controls (GnomAD database)

NA: not applicable,
